# Supplementary material for: The Effects of Differentiated Organic Fertilization on Tomato Production and Phenolic Content in Traditional and High-Yielding Varieties
Source: MDPI journal article supplement (doi:10.3390/antiox11112127), 2022-10-28
Supplement: s1 [file s1]

## Supplementary Data

**Table S1.** Brix of the tomato samples. Results are the mean of the three replicates  $\pm$  the standard deviation.

|   | Varietal group | Variety         | $^{\circ}$ Brix     |
|---|----------------|-----------------|---------------------|
| 1 | Pebroter       | Cornabel        | $5.17 \pm 0.77$ abc |
| 2 | Pebroter       | Cuban Pepper    | $5.96 \pm 0.61$ a   |
| 3 | Pebroter       | Corno Andino    | $5.60 \pm 0.50$ ab  |
| 4 | Montserrat     | Montserrat Fitó | $5.01 \pm 0.71$ bcd |
| 5 | Montserrat     | Can Duran       | $4.38 \pm 0.76$ cd  |
| 6 | Montserrat     | Montserrat Ple  | $4.34 \pm 0.55$ d   |

Data are shown as mean  $\pm$  standard deviation (n=3). Different letters represent significant differences in  $^{\circ}$  Brix observed between varieties ( $p < 0.05$ ).

**Table S2.** The phenolic compounds identified in the tomato varieties, their neutral molecular formula, the retention time, and the fragments used in the MS.

| Compound                    | Neutral molecular formula                       | Retention time (min)                 | MS (Fragments) |
|-----------------------------|-------------------------------------------------|--------------------------------------|----------------|
| Apigenin glucoside          | C <sub>21</sub> H <sub>20</sub> O <sub>10</sub> | 1.08<br>1.16                         | 431/269        |
| Caffeic                     | C <sub>9</sub> H <sub>8</sub> O <sub>4</sub>    | 1.28                                 | 179/135        |
| Caffeic hexoside            | C <sub>15</sub> H <sub>18</sub> O <sub>9</sub>  | 0.83<br>1.00<br>1.08<br>1.30<br>1.36 | 341/179        |
| Chlorogenic                 | C <sub>16</sub> H <sub>18</sub> O <sub>9</sub>  | 1.11                                 | 353/191        |
| <i>m</i> -coumaric acid     | C <sub>9</sub> H <sub>8</sub> O <sub>3</sub>    | 1.16                                 | 163/119        |
| <i>o</i> -coumaric acid     | C <sub>9</sub> H <sub>8</sub> O <sub>3</sub>    | 1.65                                 | 163/119        |
| <i>p</i> -coumaric acid     | C <sub>9</sub> H <sub>8</sub> O <sub>3</sub>    | 0.84                                 | 163/119        |
| Coumaric glucoside          | C <sub>15</sub> H <sub>18</sub> O <sub>8</sub>  | 0.85<br>1.16<br>1.28                 | 325/163        |
| Cryptochlorogenic           | C <sub>16</sub> H <sub>18</sub> O <sub>9</sub>  | 1.37                                 | 353/191        |
| Ferulic glucoside           | C <sub>16</sub> H <sub>20</sub> O <sub>9</sub>  | 0.98<br>1.10<br>1.30                 | 355/193        |
| Gallic acid                 | C <sub>7</sub> H <sub>6</sub> O <sub>5</sub>    | 1.68                                 | 169/125        |
| Homovanillic acid glucoside | C <sub>15</sub> H <sub>20</sub> O <sub>9</sub>  | 1.01                                 | 343/181        |
| 4-Hydroxybenzoic acid       | C <sub>7</sub> H <sub>6</sub> O <sub>3</sub>    | 0.53                                 | 137/93         |
| Naringenin                  | C <sub>15</sub> H <sub>12</sub> O <sub>5</sub>  | 2.56                                 | 271/151        |
| Naringenin glucoside        | C <sub>21</sub> H <sub>22</sub> O <sub>10</sub> | 2.22<br>2.43                         | 433/271        |
| Naringin                    | C <sub>27</sub> H <sub>32</sub> O <sub>14</sub> | 2.56                                 | 579/271        |
| Neochlorogenic              | C <sub>16</sub> H <sub>18</sub> O <sub>9</sub>  | 1.11                                 | 353/191        |
| Protocatechuic              | C <sub>7</sub> H <sub>6</sub> O <sub>4</sub>    | 1.13                                 | 153/109        |
| Quercetin                   | C <sub>15</sub> H <sub>10</sub> O <sub>7</sub>  | 2.58                                 | 301/151        |
| Rutin                       | C <sub>27</sub> H <sub>30</sub> O <sub>16</sub> | 1.79                                 | 609/300        |
| Dicaffeolquinic             | C <sub>25</sub> H <sub>24</sub> O <sub>12</sub> | 2.10<br>2.24                         | 515/353        |
| Tricaffeolquinic            | C <sub>34</sub> H <sub>30</sub> O <sub>15</sub> | 2.49                                 | 677/515        |

**Table S3.** Polyphenols concentrations (mg/kg) according to fertilization and varieties.

| Polyphenols                 | Fertilization N rich (n=18) |               |               | Fertilization N rich+C (n=18) |               |               | Fertilization N poor +C (n=18) |               |               |
|-----------------------------|-----------------------------|---------------|---------------|-------------------------------|---------------|---------------|--------------------------------|---------------|---------------|
|                             | Total                       | Pebroter      | Monserrat     | Total                         | Pebroter      | Monserrat     | Total                          | Pebroter      | Monserrat     |
| Apigenin glucoside          | 2.84 ± 1.41                 | 2.35 ± 0.91   | 3.32 ± 1.69   | 2.95 ± 1.44                   | 2.18 ± 0.95   | 3.72 ± 1.48   | 2.67 ± 1.44                    | 1.96 ± 0.58   | 3.38 ± 1.71   |
| Caffeic                     | 2.55 ± 1.15                 | 2.22 ± 0.42   | 2.87 ± 1.55   | 1.85 ± 0.91                   | 1.87 ± 0.81   | 1.83 ± 1.06   | 1.78 ± 0.81                    | 1.78 ± 1.11   | 1.77 ± 0.39   |
| Caffeic hexoside            | 9.83 ± 5.14                 | 7.96 ± 3.51   | 11.69 ± 6.00  | 9.69 ± 4.22                   | 7.60 ± 4.51   | 11.78 ± 2.76  | 6.91 ± 2.85                    | 5.97 ± 1.95   | 7.85 ± 3.38   |
| Chlorogenic                 | 16.65 ± 5.57                | 14.41 ± 6.25  | 18.89 ± 3.93  | 16.87 ± 8.88                  | 16.12 ± 6.98  | 17.63 ± 10.85 | 16.17 ± 8.16                   | 15.42 ± 9.97  | 16.92 ± 6.38  |
| <i>m</i> -coumaric acid     | 5.58 ± 2.33                 | 5.24 ± 2.97   | 5.93 ± 1.57   | 5.57 ± 1.96                   | 5.59 ± 1.97   | 5.55 ± 2.07   | 4.61 ± 1.96                    | 3.89 ± 1.54   | 5.32 ± 2.16   |
| <i>o</i> -coumaric acid     | 10.93 ± 6.97                | 7.55 ± 3.78   | 14.32 ± 7.96  | 10.36 ± 5.05                  | 7.25 ± 4.58   | 13.48 ± 3.37  | 7.98 ± 4.36                    | 6.16 ± 2.87   | 9.80 ± 4.98   |
| <i>p</i> -coumaric acid     | 1.53 ± 1.2                  | 1.14 ± 0.52   | 1.92 ± 1.56   | 1.46 ± 0.7                    | 1.39 ± 0.90   | 1.53 ± 0.46   | 1.32 ± 0.83                    | 1.02 ± 0.55   | 1.63 ± 0.98   |
| Coumaric glucoside          | 22.94 ± 9.07                | 19.89 ± 8.80  | 25.99 ± 8.73  | 22.92 ± 7.37                  | 20.46 ± 7.74  | 25.39 ± 6.46  | 18.59 ± 6.63                   | 14.86 ± 5.28  | 22.31 ± 5.86  |
| Cryptoclorogenic            | 1.74 ± 0.61                 | 1.68 ± 0.75   | 1.80 ± 0.47   | 1.67 ± 0.71                   | 1.68 ± 0.85   | 1.66 ± 0.59   | 1.47 ± 0.53                    | 1.41 ± 0.39   | 1.54 ± 0.66   |
| Ferulic glucoside           | 1.01 ± 0.52                 | 0.84 ± 0.45   | 1.17 ± 0.56   | 1.01 ± 0.58                   | 0.73 ± 0.39   | 1.30 ± 0.61   | 0.8 ± 0.38                     | 0.65 ± 0.22   | 0.95 ± 0.45   |
| Gallic acid                 | 12.52 ± 0.45                | 12.38 ± 0.43  | 12.67 ± 0.45  | 12.68 ± 0.76                  | 12.76 ± 0.91  | 12.60 ± 0.63  | 12.46 ± 0.41                   | 12.29 ± 0.40  | 12.63 ± 0.37  |
| Homovanillic acid glucoside | 0.32 ± 0.25                 | 0.25 ± 0.23   | 0.39 ± 0.26   | 0.36 ± 0.22                   | 0.23 ± 0.20   | 0.48 ± 0.18   | 0.21 ± 0.17                    | 0.10 ± 0.14   | 0.30 ± 0.14   |
| 4 -Hydroxybenzoic acid      | 0.42 ± 0.26                 | 0.30 ± 0.23   | 0.54 ± 0.23   | 0.48 ± 0.24                   | 0.35 ± 0.22   | 0.61 ± 0.18   | 0.62 ± 0.26                    | 0.51 ± 0.22   | 0.72 ± 0.26   |
| Naringenin                  | 14.2 ± 19.49                | 16.24 ± 19.95 | 12.17 ± 19.99 | 8.61 ± 14.71                  | 17.14 ± 17.20 | 0.08 ± 0.24   | 23.45 ± 30.2                   | 33.07 ± 34.90 | 13.82 ± 22.64 |
| Naringenin glucoside        | 5.03 ± 6.41                 | 6.72 ± 7.65   | 3.34 ± 4.72   | 5.5 ± 9.81                    | 10.91 ± 11.77 | 0.10 ± 0.30   | 6.46 ± 5.94                    | 10.73 ± 4.75  | 2.20 ± 3.40   |
| Naringin                    | 0.15 ± 0.45                 | 0.30 ± 0.62   | 0.00 ± 0.00   | 0 ± 0                         | 0.00 ± 0.00   | 0.00 ± 0.00   | 0.5 ± 0.99                     | 0.52 ± 1.01   | 0.49 ± 1.03   |
| Neochlorogenic              | 0.13 ± 0.08                 | 0.11 ± 0.04   | 0.15 ± 0.10   | 0.11 ± 0.06                   | 0.10 ± 0.05   | 0.12 ± 0.06   | 0.09 ± 0.04                    | 0.08 ± 0.04   | 0.10 ± 0.03   |
| Protocatechuic              | 0.87 ± 0.34                 | 0.96 ± 0.41   | 0.79 ± 0.24   | 0.81 ± 0.39                   | 0.86 ± 0.37   | 0.77 ± 0.42   | 0.93 ± 0.56                    | 1.02 ± 0.75   | 0.84 ± 0.31   |
| Quercetin                   | 0.67 ± 0.87                 | 0.97 ± 0.95   | 0.36 ± 0.72   | 0.39 ± 1                      | 0.77 ± 1.33   | 0.00 ± 0.00   | 0.8 ± 0.93                     | 1.23 ± 0.94   | 0.37 ± 0.74   |
| Rutin                       | 14.01 ± 10.91               | 14.03 ± 10.52 | 13.99 ± 11.92 | 12.37 ± 9.83                  | 16.43 ± 9.23  | 8.31 ± 9.11   | 16.08 ± 10.3                   | 20.17 ± 7.66  | 12.00 ± 11.36 |
| Tricaffeolquinic            | 0.03 ± 0.06                 | 0.05 ± 0.07   | 0.02 ± 0.04   | 0.04 ± 0.06                   | 0.04 ± 0.08   | 0.05 ± 0.06   | 0.03 ± 0.06                    | 0.01 ± 0.04   | 0.05 ± 0.06   |

Data are shown as mean ± standard deviation.
